# Supplementary material for: Ketamine reduces aversion in rodent pain models by suppressing hyperactivity of the anterior cingulate cortex
Source: PubMed Central journal article supplement (PMC6138720; doi:10.1038/s41467-018-06295-x), 2018-09-14
Supplement: 41467_2018_6295_MOESM1_ESM.pdf [file 41467_2018_6295_MOESM1_ESM.pdf]

## **Supplementary Information**

Title: Ketamine Reduces Aversion in Rodent Pain Models by Suppressing Hyperactivity of the Anterior Cingulate Cortex

Zhou et al.

a.

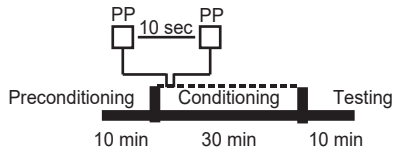

b.

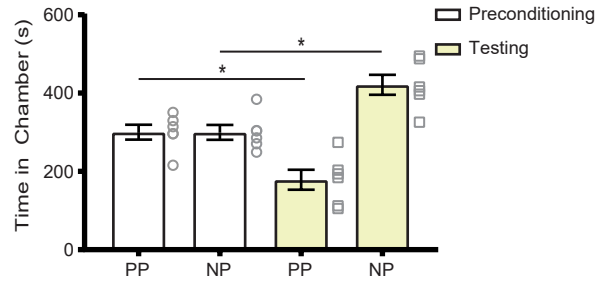

c.

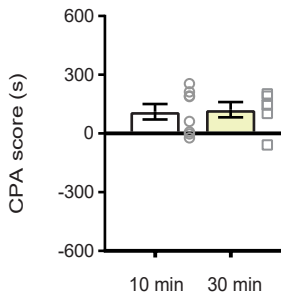

**Supplementary Fig. 1. An extended duration of the conditioning phase did not alter the aversive response to acute pain.** a Protocol of a 30-min conditioning phase for the CPA assay. b After 30 minutes of conditioning, naïve rats displayed avoidance to the chamber paired with a noxious stimulus (PP).  $n=6$ ;  $p=0.0261$ , paired Student's t test. c The 30-min conditioning protocol did not alter the aversive response to acute noxious stimulations, compared with the 10-min conditioning protocol.  $n=6-7$ ;  $p=0.8577$ , unpaired Student's t test. Error bars represent S.E.M.

**a.**

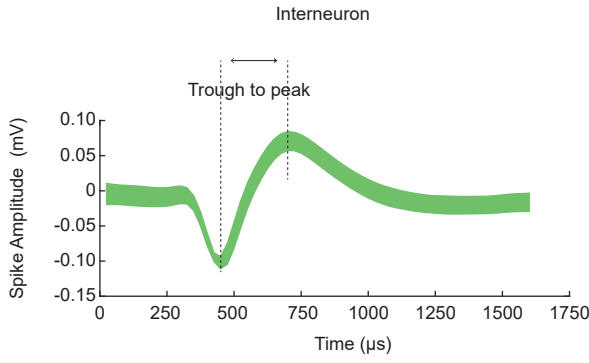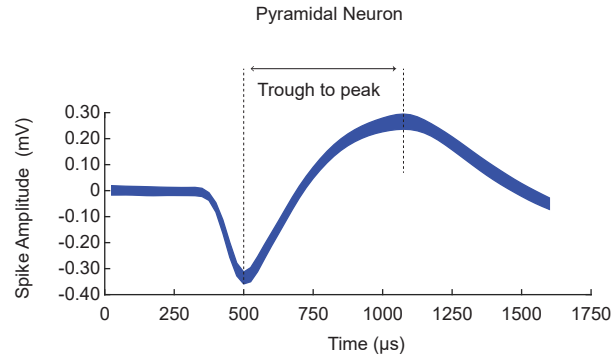

**b.**

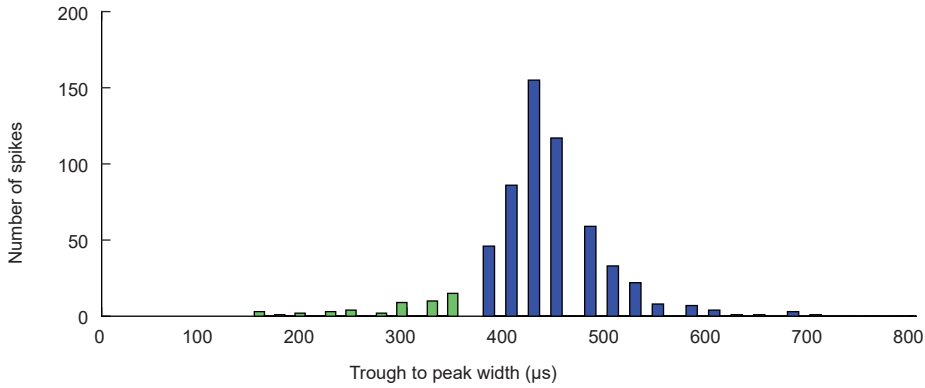

**c.**

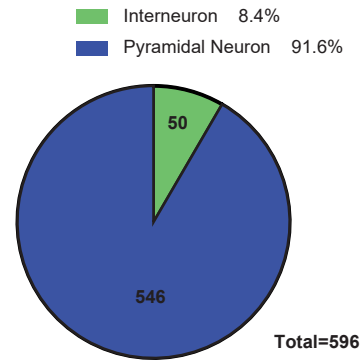

**Supplementary Fig. 2. Identification of recorded neurons in the ACC.** **a** Example spike waveforms of an interneuron and a pyramidal neuron. **b** Histogram of spike trough to peak widths. Interneurons have shorter trough to peak widths (<360  $\mu$ s), while pyramidal neurons have longer widths. **c** Proportions of recorded interneurons and pyramidal neurons in the ACC.
